# Supplementary material for: Impact of Atrial Fibrillation on Patients Undergoing Transcatheter Aortic Valve Implantation (TAVI): The K-TAVI Registry
Source: PubMed Central journal article supplement — Yonsei Med J. 2023 Jun 16;64(7):413–22. doi: 10.3349/ymj.2022.0649 (PMC10307679; doi:10.3349/ymj.2022.0649), 2023-06-16
Supplement: ymj-64-413-s001.pdf [file ymj-64-413-s001.pdf]

**Supplementary Table 1.** Baseline Clinical and Procedural Characteristics According to Onset Timing of AF

| Variables                                   | Pre-existing AF (n=108) | New-onset AF (n=27) | p value |
|---------------------------------------------|-------------------------|---------------------|---------|
| <b>Demographics</b>                         |                         |                     |         |
| Age, yr                                     | 79.3±7.3                | 80.2±4.3            | 0.404   |
| Sex, male                                   | 55 (50.9)               | 12 (44.4)           | 0.699   |
| Body mass index, kg/m <sup>2</sup>          | 23.7±3.3                | 23.5±3.8            | 0.713   |
| <b>Risk factors</b>                         |                         |                     |         |
| Hypertension                                | 81 (75.0)               | 23 (85.2)           | 0.384   |
| Diabetes mellitus                           | 40 (37.0)               | 11 (40.7)           | 0.894   |
| Previous history of stroke                  | 24 (22.2)               | 4 (14.8)            | 0.559   |
| Peripheral artery disease                   | 10 (9.3)                | 4 (14.8)            | 0.621   |
| Previous myocardial infarction              | 8 (7.4)                 | 6 (22.2)            | 0.057   |
| Previous percutaneous coronary intervention | 22 (20.4)               | 9 (33.3)            | 0.239   |
| COPD                                        | 17 (15.7)               | 1 (3.7)             | 0.184   |
| Current smoking                             | 7 (6.5)                 | 1 (3.7)             | 0.927   |
| Previous AVR                                | 2 (1.9)                 | 0 (0)               | >0.999  |
| Previous CABG                               | 1 (0.9)                 | 1 (3.7)             | 0.859   |
| Previous renal replacement therapy          | 5 (4.6)                 | 1 (3.7)             | >0.999  |
| <b>ECG findings</b>                         |                         |                     |         |
| Rhythm                                      |                         |                     | <0.001  |
| Sinus rhythm                                | 0 (0)                   | 27 (100)            |         |
| Pre-existing AF or flutter                  | 108 (100)               | 0 (0)               |         |
| New onset AF or flutter                     | 0 (0)                   | 27 (100)            |         |
| LBBB                                        | 3 (2.8)                 | 0 (0)               | 0.884   |
| RBBB                                        | 12 (11.1)               | 3 (11.1)            | >0.999  |
| Pacing rhythm                               | 1 (0.9)                 | 0 (0)               | >0.999  |
| <b>Risk scoring system</b>                  |                         |                     |         |
| STS score                                   | 8.2±6.1                 | 11.3±10.5           | 0.159   |
| Euro-score II                               | 12.2±9.6                | 11.7±9.3            | 0.832   |
| CHAS2-VaSc score                            | 4.2±1.5                 | 4.6±1.6             | 0.209   |
| <b>Anatomical characteristics</b>           |                         |                     |         |
| AV morphology                               |                         |                     | 0.940   |
| Tricuspid                                   | 99 (91.7)               | 24 (88.9)           |         |
| Bicuspid                                    | 9 (8.3)                 | 3 (11.1)            |         |
| Others                                      | 0 (0)                   | 0 (0)               |         |
| Combined CAD                                | 39 (36.1)               | 14 (51.9)           | 0.201   |
| Left main or proximal LAD involvement       | 14 (13.0)               | 4 (14.8)            | >0.999  |
| Annulus diameter, mm                        | 23.1±2.6                | 23.1±3.2            | 0.985   |
| <b>Laboratory findings</b>                  |                         |                     |         |
| Creatinine, mg/dL                           | 1.3±1.0                 | 1.5±1.7             | 0.575   |
| Hematocrit, %                               | 35.3±5.3                | 33.7±5.0            | 0.859   |
| WBC, /mm <sup>3</sup>                       | 6760±2650               | 7730±2590           | 0.936   |
| <b>Procedural characteristics</b>           |                         |                     |         |
| Successful implantation                     | 107 (99.1)              | 27 (100)            | 0.884   |
| Puncture to close time, minute              | 75.2±31.8               | 99.3±53.9           | 0.326   |
| General anesthesia                          | 104 (96.3)              | 25 (92.6)           | 0.754   |
| Anesthesia time, minute                     | 125.7±38.3              | 159.2±65.8          | 0.016   |
| Transfemoral approach                       | 107 (99.1)              | 26 (96.3)           | 0.118   |
| Type of device                              |                         |                     | 0.728   |
| SAPIEN XT or 3                              | 59 (54.6)               | 14 (51.9)           |         |
| CoreValve or Evolut R                       | 1 (0.9)                 | 0 (0)               |         |
| Others                                      | 0 (0)                   | 1 (3.7)             |         |
| Device size, mm                             | 26.5±2.3                | 26.4±2.5            | 0.747   |
| <b>Medications at discharge</b>             |                         |                     |         |
| Aspirin                                     | 61 (56.5)               | 20 (74.1)           | 0.147   |
| P2Y12 inhibitor                             | 80 (74.1)               | 19 (70.4)           | 0.884   |
| NOAC                                        | 45 (41.7)               | 7 (25.9)            | 0.200   |
| Warfarin                                    | 17 (15.7)               | 0 (0)               | 0.060   |
| Cilostazol                                  | 0 (0)                   | 0 (0)               | >0.999  |

AF, atrial fibrillation; AV, aortic valve; AVR, aortic valve replacement; CABG, coronary artery bypass graft; CAD, coronary artery disease; COPD, chronic obstructive pulmonary disease; ECG, electrocardiogram; LAD, left anterior descending artery; LBBB, left bundle branch block; NOAC, non-vitamin K antagonist oral anticoagulant; RBBB, right bundle branch block; STS, Society of Thoracic Surgeons; WBC, white blood cell.

Data are presented as mean±standard deviation or n (%).
