# Supplementary material for: Impact of Atrial Fibrillation on Patients Undergoing Transcatheter Aortic Valve Implantation (TAVI): The K-TAVI Registry
Source: PubMed Central journal article supplement — Yonsei Med J. 2023 Jun 16;64(7):413–22. doi: 10.3349/ymj.2022.0649 (PMC10307679; doi:10.3349/ymj.2022.0649), 2023-06-16
Supplement: ymj-64-413-s002.pdf [file ymj-64-413-s002.pdf]

**Supplementary Table 2.** Baseline Hemodynamic and Echocardiographic Characteristics According to Onset Timing of AF

| Variables                                      | Pre-existing AF (n=108) | New-onset AF (n=27) | p value |
|------------------------------------------------|-------------------------|---------------------|---------|
| <b>Pre-TAVI</b>                                |                         |                     |         |
| Systolic blood pressure, mm Hg                 | 126.1±22.0              | 128.7±22.1          | 0.582   |
| Diastolic blood pressure, mm Hg                | 69.0±13.5               | 67.8±12.6           | 0.692   |
| Heart rate, /min                               | 74.6±16.2               | 74.9±15.3           | 0.920   |
| LVEDP, mm Hg                                   | 22.7±9.2                | 22.1±9.0            | 0.569   |
| AV Vmax, m/s                                   | 4.5±0.8                 | 4.6±0.8             | 0.349   |
| AV mean pressure gradient, mm Hg               | 50.0±18.5               | 51.6±17.5           | 0.695   |
| AV area, cm <sup>2</sup>                       | 0.7±0.2                 | 0.7±0.2             | 0.957   |
| AV area index, cm <sup>2</sup> /m <sup>2</sup> | 0.5±0.3                 | 0.5±0.2             | 0.832   |
| LVEF, %                                        | 53.5±12.0               | 57.3±12.2           | 0.148   |
| E/e'                                           | 21.8±9.4                | 19.5±7.8            | 0.357   |
| RVSP, mm Hg                                    | 44.7±14.3               | 36.0±8.4            | 0.002   |
| LAVI, mL/m <sup>2</sup>                        | 75.4±43.6               | 43.7±16.7           | <0.001  |
| Moderate to severe mitral regurgitation        | 26 (24.1)               | 5 (18.5)            | 0.720   |
| Moderate or severer aortic regurgitation       | 23 (21.3)               | 5 (18.5)            | 0.958   |
| <b>Post-TAVI</b>                               |                         |                     |         |
| Systolic blood pressure, mm Hg                 | 126.4±21.3              | 130.0±18.2          | 0.420   |
| Diastolic blood pressure, mm Hg                | 64.8±13.3               | 63.8±14.2           | 0.740   |
| Heart rate, /min                               | 79.3±14.9               | 83.5±19.1           | 0.217   |
| LVEDP, mm Hg                                   | 23.7±7.0                | 23.5±7.5            | 0.669   |
| AV Vmax, m/s                                   | 2.3±0.5                 | 2.4±0.5             | 0.399   |
| AV mean pressure gradient, mm Hg               | 10.9±4.9                | 12.3±4.9            | 0.220   |
| AV EOA, cm <sup>2</sup>                        | 1.7±0.4                 | 1.8±0.6             | 0.591   |
| AV EOAI, cm <sup>2</sup> /m <sup>2</sup>       | 1.1±0.3                 | 1.2±0.4             | 0.181   |
| LVEF, %                                        | 56.9±9.9                | 57.3±11.6           | 0.851   |
| E/e'                                           | 21.2±9.7                | 21.4±9.8            | 0.911   |
| RVSP, mm Hg                                    | 39.4±13.8               | 36.5±9.4            | 0.447   |
| LAVI, mL/m <sup>2</sup>                        | 81.7±59.3               | 46.9±18.5           | <0.001  |
| Moderate or severe paravalvular leakage        | 6 (5.6)                 | 3 (11.1)            | 0.546   |
| Moderate or severe mitral regurgitation        | 13 (12.0)               | 3 (11.1)            | >0.999  |
| <b>1-month follow-up</b>                       |                         |                     |         |
| Systolic blood pressure, mm Hg                 | 129.3±20.9              | 129.2±19.6          | 0.996   |
| Diastolic blood pressure, mm Hg                | 69.0±13.4               | 66.0±9.8            | 0.335   |
| Heart rate, /min                               | 76.9±15.8               | 71.9±13.4           | 0.214   |
| AV Vmax, m/s                                   | 2.3±0.4                 | 2.3±0.4             | 0.827   |
| AV mean pressure gradient, mm Hg               | 10.7±4.1                | 11.4±4.6            | 0.532   |
| AV EOA, cm <sup>2</sup>                        | 1.6±0.4                 | 1.6±0.3             | 0.967   |
| AV EOAI, cm <sup>2</sup> /m <sup>2</sup>       | 1.0±0.3                 | 1.1±0.2             | 0.548   |
| LVEF, %                                        | 58.9±9.0                | 65.0±6.3            | 0.012   |
| E/e'                                           | 21.6±9.9                | 16.5±3.4            | 0.004   |
| RVSP, mm Hg                                    | 37.8±14.5               | 30.6±4.2            | 0.005   |
| LAVI, mL/m <sup>2</sup>                        | 83.2±64.7               | 36.0±17.2           | <0.001  |
| Moderate to severe mitral regurgitation        | 3 (4.9)                 | 1 (6.3)             | 0.619   |
| Moderate or severe paravalvular leakage        | 4 (6.6)                 | 0 (0)               | 0.025   |

AF, atrial fibrillation; AV, aortic valve; EOA, effective orifice area; EOAI, effective orifice area index; LAVI, left atrium volume index; LVEDP, left ventricular end-diastolic pressure; LVEF, left ventricular ejection fraction; RVSP, right ventricular systolic pressure; TAVI, transcatheter aortic valve implantation.

Data are presented as mean±standard deviation or n (%).
