# Supplementary material for: Impact of Atrial Fibrillation on Patients Undergoing Transcatheter Aortic Valve Implantation (TAVI): The K-TAVI Registry
Source: PubMed Central journal article supplement — Yonsei Med J. 2023 Jun 16;64(7):413–22. doi: 10.3349/ymj.2022.0649 (PMC10307679; doi:10.3349/ymj.2022.0649), 2023-06-16
Supplement: ymj-64-413-s003.pdf [file ymj-64-413-s003.pdf]

**Supplementary Table 3.** One-Year Clinical Outcomes According to AF Onset Timing

|                      | SR<br>(n=525) | Pre-existing AF<br>(n=108) | New-onset AF<br>(n=27) | SR vs. Pre-existing AF |             |         | SR vs. New-onset AF |             |         |
|----------------------|---------------|----------------------------|------------------------|------------------------|-------------|---------|---------------------|-------------|---------|
|                      |               |                            |                        | HR                     | 95%CI       | p value | HR                  | 95%CI       | p value |
| All-cause death      | 29 (6.4)      | 16 (17.1)                  | 3 (12.5)               | 2.932                  | 1.592–5.400 | 0.001   | 2.119               | 0.646–6.958 | 0.216   |
| Cardiovascular death | 8 (1.9)       | 10 (11.3)                  | 0 (0)                  | 6.719                  | 2.650–17.04 | <0.001  | NA                  | NA          | NA      |
| Stroke               | 11 (2.6)      | 1 (1.0)                    | 1 (4.2)                | 0.487                  | 0.063–3.775 | 0.491   | 1.934               | 0.250–14.99 | 0.528   |
| Bleeding             | 52 (10.3)     | 14 (14.3)                  | 5 (20.0)               | 1.345                  | 0.745–2.427 | 0.325   | 1.978               | 0.790–4.953 | 0.145   |
| Pacemaker insertion  | 26 (5.5)      | 10 (10.6)                  | 7 (27.5)               | 1.960                  | 0.945–4.066 | 0.071   | 6.329               | 2.742–14.60 | <0.001  |

AF, atrial fibrillation; CI, confidence interval; HR, hazard ratio; SR, sinus rhythm; N/A, not applicable.

Values are n (%). The cumulative incidence of events is presented as Kaplan-Meier estimates.
