# Supplementary material for: Impact of Atrial Fibrillation on Patients Undergoing Transcatheter Aortic Valve Implantation (TAVI): The K-TAVI Registry
Source: PubMed Central journal article supplement — Yonsei Med J. 2023 Jun 16;64(7):413–22. doi: 10.3349/ymj.2022.0649 (PMC10307679; doi:10.3349/ymj.2022.0649), 2023-06-16
Supplement: ymj-64-413-s004.pdf [file ymj-64-413-s004.pdf]

**Supplementary Table 4.** Independent Predictors of New-Onset AF after TAVI

|                                                   | Multivariable analysis* |             |         |
|---------------------------------------------------|-------------------------|-------------|---------|
|                                                   | Adjusted OR             | 95%CI       | p value |
| CHAS2-VaSc score (per 1 increase)                 | 2.071                   | 1.126–3.810 | 0.019   |
| Anesthesia duration<br>(min, per 10 min increase) | 1.150                   | 1.034–1.280 | 0.010   |
| Pre-TAVI creatinine<br>(mg/dL, per 1 increase)    | 1.486                   | 1.001–2.207 | 0.049   |

AF, atrial fibrillation; CI, confidence interval; OR, odds ratio; TAVI, transcatheter aortic valve implantation.

\*Adjusted variables included age, sex, body mass index, previous cardiac surgery, left ventricular ejection fraction, left atrial volume index, E/e', device size, anesthesia duration, pre-TAVI creatinine, and CHAS2-VaSc score. The C-index of the multivariable logistic regression model was 0.901 (0.818–0.985).
