# Supplementary material for: Impact of Atrial Fibrillation on Patients Undergoing Transcatheter Aortic Valve Implantation (TAVI): The K-TAVI Registry
Source: PubMed Central journal article supplement — Yonsei Med J. 2023 Jun 16;64(7):413–22. doi: 10.3349/ymj.2022.0649 (PMC10307679; doi:10.3349/ymj.2022.0649), 2023-06-16
Supplement: ymj-64-413-s005.pdf [file ymj-64-413-s005.pdf]

**Supplementary Table 5.** Specific Type of Antithrombotic Therapy in Patients with AF after TAVI

|                        | <b>SAPT or DAPT (n=55)</b> |                  | <b>Single OAC or SAPT+OAC (n=50)</b> |          | <b>DAPT+OAC (n=21)</b>       |         |
|------------------------|----------------------------|------------------|--------------------------------------|----------|------------------------------|---------|
| No previous PCI (n=98) | Aspirin                    | 1 (0.8)          | Warfarin                             | 6 (4.8)  | Aspirin+Clopidogrel+Warfarin | 7 (5.5) |
|                        | Clopidogrel                | 5 (4.0)          | NOAC                                 | 11 (8.7) | Aspirin+Clopidogrel+NOAC     | 8 (6.3) |
|                        | Aspirin+Clopidogrel        | 38 (30.2)        | Aspirin+Warfarin                     | 1 (0.8)  |                              |         |
|                        |                            |                  | Aspirin+NOAC                         | 5 (4.0)  |                              |         |
|                        |                            |                  | Clopidogrel+Warfarin                 | 3 (2.4)  |                              |         |
|                        |                            | Clopidogrel+NOAC | 13 (10.3)                            |          |                              |         |
| Previous PCI (n=28)    | Aspirin                    | 1 (0.8)          | NOAC                                 | 4 (3.2)  | Aspirin+Clopidogrel+Warfarin | 1 (0.8) |
|                        | Aspirin+Clopidogrel        | 10 (7.9)         | Clopidogrel+NOAC                     | 7 (5.5)  | Aspirin+Clopidogrel+NOAC     | 5 (4.0) |

AF, atrial fibrillation; DAPT, dual antiplatelet therapy; NOAC, non-vitamin K antagonist oral anticoagulant; OAC, oral anticoagulant; PCI, percutaneous coronary intervention; SAPT, single antiplatelet therapy; TAVI, transcatheter aortic valve implantation.

Data are presented as n (%) of the total study population.
