# Supplementary material for: Impact of Atrial Fibrillation on Patients Undergoing Transcatheter Aortic Valve Implantation (TAVI): The K-TAVI Registry
Source: PubMed Central journal article supplement — Yonsei Med J. 2023 Jun 16;64(7):413–22. doi: 10.3349/ymj.2022.0649 (PMC10307679; doi:10.3349/ymj.2022.0649), 2023-06-16
Supplement: ymj-64-413-s006.pdf [file ymj-64-413-s006.pdf]

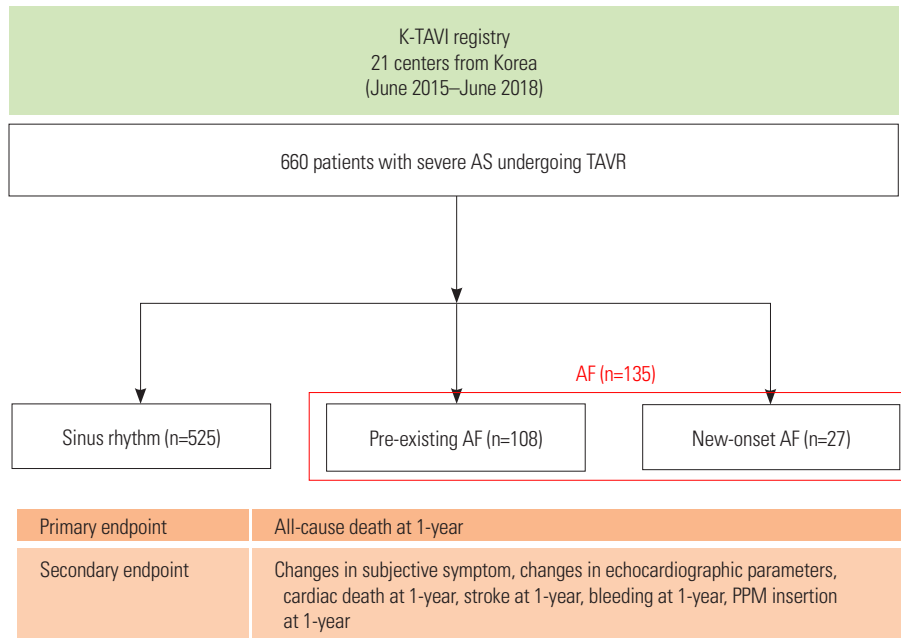

**Supplementary Fig. 1.** Study flow. A flow diagram is shown. AF, atrial fibrillation; AS, aortic stenosis; PPM, permanent pacemaker; TAVI, transcatheter aortic valve implantation.
