# Supplementary material for: Impact of Atrial Fibrillation on Patients Undergoing Transcatheter Aortic Valve Implantation (TAVI): The K-TAVI Registry
Source: PubMed Central journal article supplement — Yonsei Med J. 2023 Jun 16;64(7):413–22. doi: 10.3349/ymj.2022.0649 (PMC10307679; doi:10.3349/ymj.2022.0649), 2023-06-16
Supplement: ymj-64-413-s007.pdf [file ymj-64-413-s007.pdf]

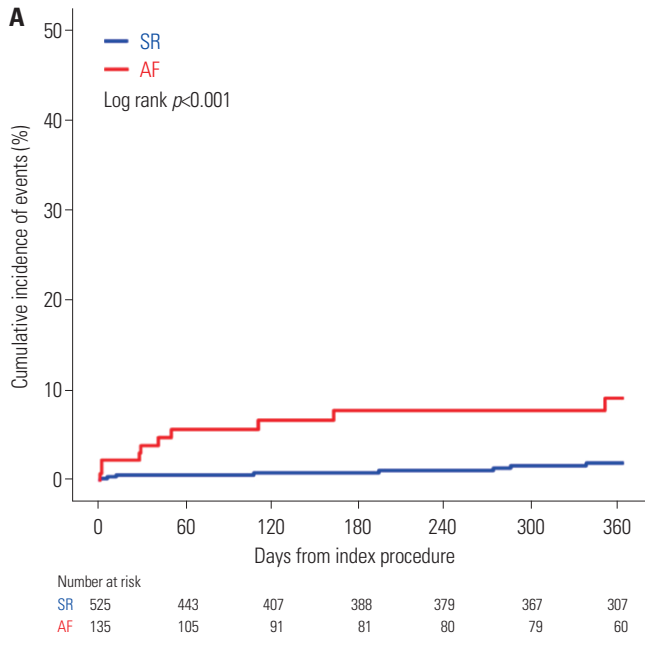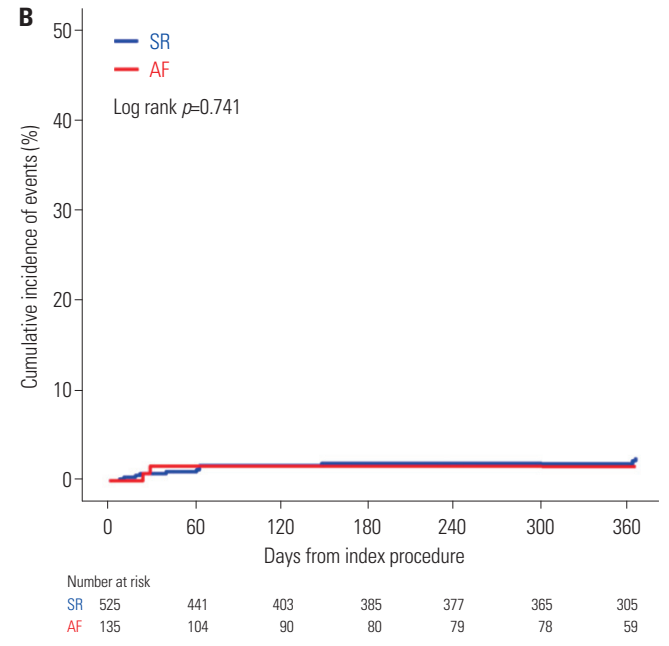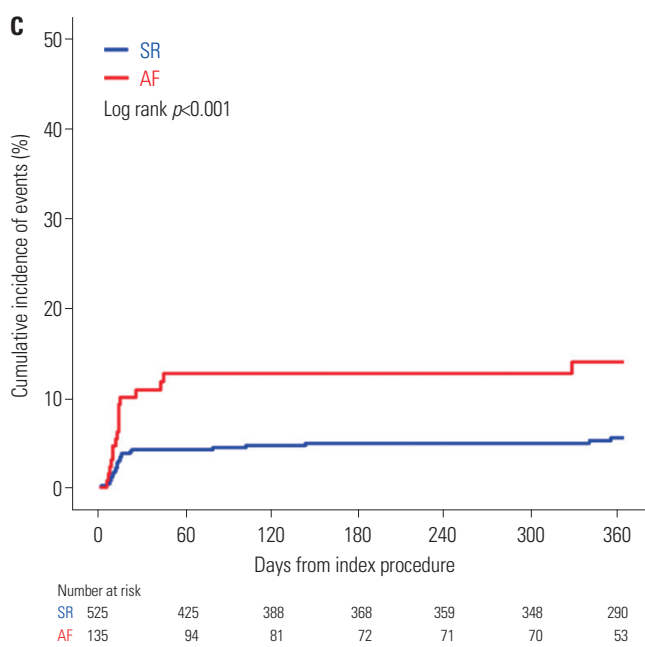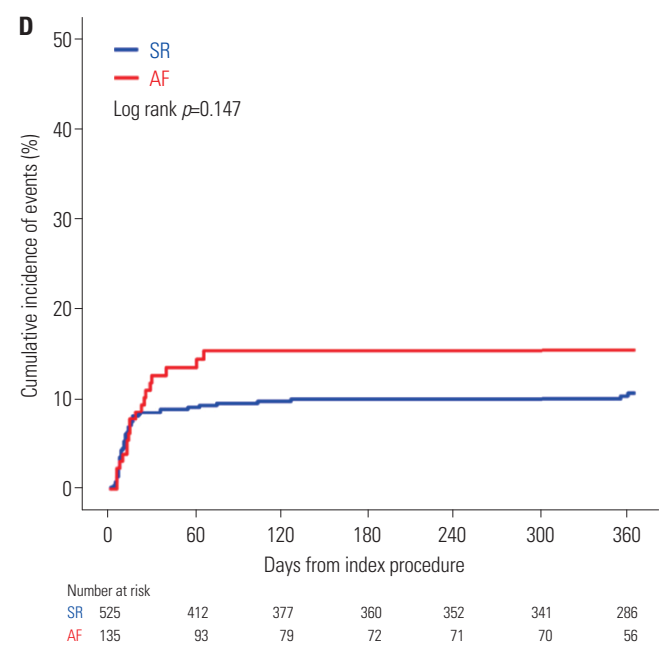

**Supplementary Fig. 2.** Comparison of 1-year clinical outcomes according to AF. Kaplan-Meier curves are shown for comparison of risks of cardiac death (A), stroke (B), new PPM insertion (C), and bleeding (D) in the study population. AF, atrial fibrillation; PPM, permanent pacemaker; SR, sinus rhythm.
