# Supplementary material for: Impact of Atrial Fibrillation on Patients Undergoing Transcatheter Aortic Valve Implantation (TAVI): The K-TAVI Registry
Source: PubMed Central journal article supplement — Yonsei Med J. 2023 Jun 16;64(7):413–22. doi: 10.3349/ymj.2022.0649 (PMC10307679; doi:10.3349/ymj.2022.0649), 2023-06-16
Supplement: ymj-64-413-s008.pdf [file ymj-64-413-s008.pdf]

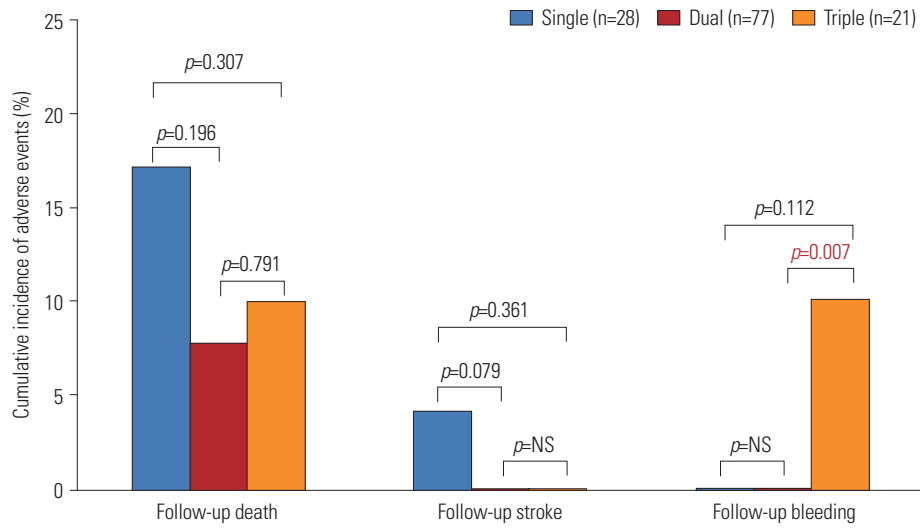

**Supplementary Fig. 3.** Comparison of 1-year cumulative incidence of adverse events according to antithrombotic therapy after discharge in AF patients undergoing TAVI. Bar plot shows the cumulative incidence of adverse events according to the antithrombotic therapy regimen after discharge of AF patients undergoing TAVI. Single-antithrombotic therapy (blue), dual-antithrombotic therapy (red), and triple-antithrombotic therapy (orange) groups are shown. AF, atrial fibrillation; TAVI, transcatheter aortic valve implantation.
